# Supplementary material
Source: HighWire-hosted journal article supplement (http://www.ajnr.org/highwire/filestream/99600/field_highwire_adjunct_files/0/0423.pdf)

### Online Supplementary Material

**Supplementary Table 1.** Subgroup analysis of BB effect according to scan order

| Sequences     | Locations | Scan order                             |                                        | <i>p</i> -values |
|---------------|-----------|----------------------------------------|----------------------------------------|------------------|
|               |           | MSDE first<br>and then DANTE<br>(n=24) | DANTE first<br>and then MSDE<br>(n=26) |                  |
| 3D-T1-FSE     | A3        | 3.75                                   | 3.42                                   | 0.043            |
| with<br>DANTE | M3        | 3.54                                   | 3.92                                   | 0.072            |
|               | P2 to P3  | 3.91                                   | 4.00                                   | 0.302            |
|               | ICV       | 1.79                                   | 1.50                                   | 0.363            |
|               | M1        | 3.50                                   | 3.69                                   | 0.266            |
| 3D-T1-FSE     | A3        | 3.95                                   | 3.84                                   | 0.193            |
| with MSDE     | M3        | 3.83                                   | 3.61                                   | 0.181            |
|               | P2 to P3  | 3.91                                   | 3.80                                   | 0.346            |
|               | ICV       | 3.54                                   | 3.73                                   | 0.450            |
|               | M1        | 3.66                                   | 3.65                                   | 0.940            |

**Supplementary Table 2.** Inter-observer agreements between the raters for qualitative and quantitative analysis

---

|                            | Inter-observer agreement  |
|----------------------------|---------------------------|
| Qualitative analysis       | 0.78* (95% CI: 0.69-0.86) |
| Black-blood visual scoring |                           |
| Quantitative analysis      | 0.71†(95% CI: 0.63-0.77)  |
| Signal-to-noise ratio      |                           |

---

CI = confidence interval

\*Weighted-kappa, †Intraclass correlation coefficient.

---

**Supplementary Figure 1.** ROI measurement technique. By using RadiAnt DICOM viewer (<http://www.radiantviewer.com/>) with 3-plane reconstructed views, targeted vessel wall and vessel lumen was evaluated at sagittal plane of each exam. Elliptical ROIs were drawn to measure maximum size of the vessel lumen uncontaminated by artifacts. Circle ROIs were drawn to measure signal intensities of the vessel wall at the most well delineated site.

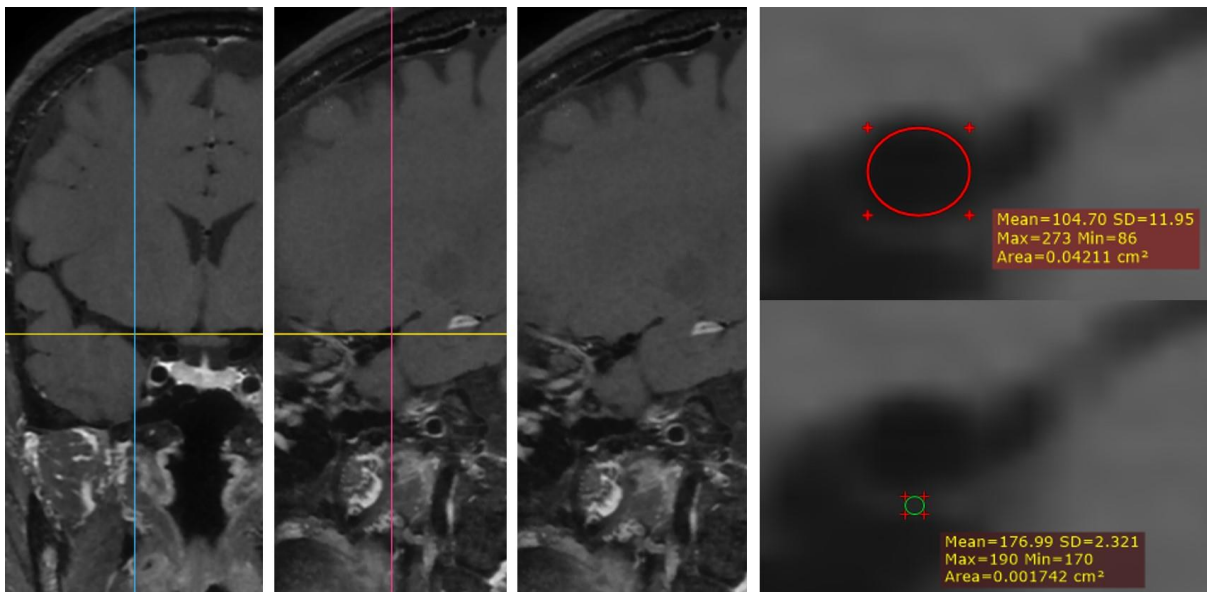

**Supplementary Figure 2.** Coronal images of cortical vein were obtained from CE 3D-T1-FSE with MSDE (A) and that with DANTE (B). Complete blood suppression in small cortical vein is observed on the CE 3D-T1-FSE with MSDE (A, arrow); however, nonsuppression of blood signal in the identical cortical vein is observed on the CE 3D-T1-FSE with DANTE (B, arrow).

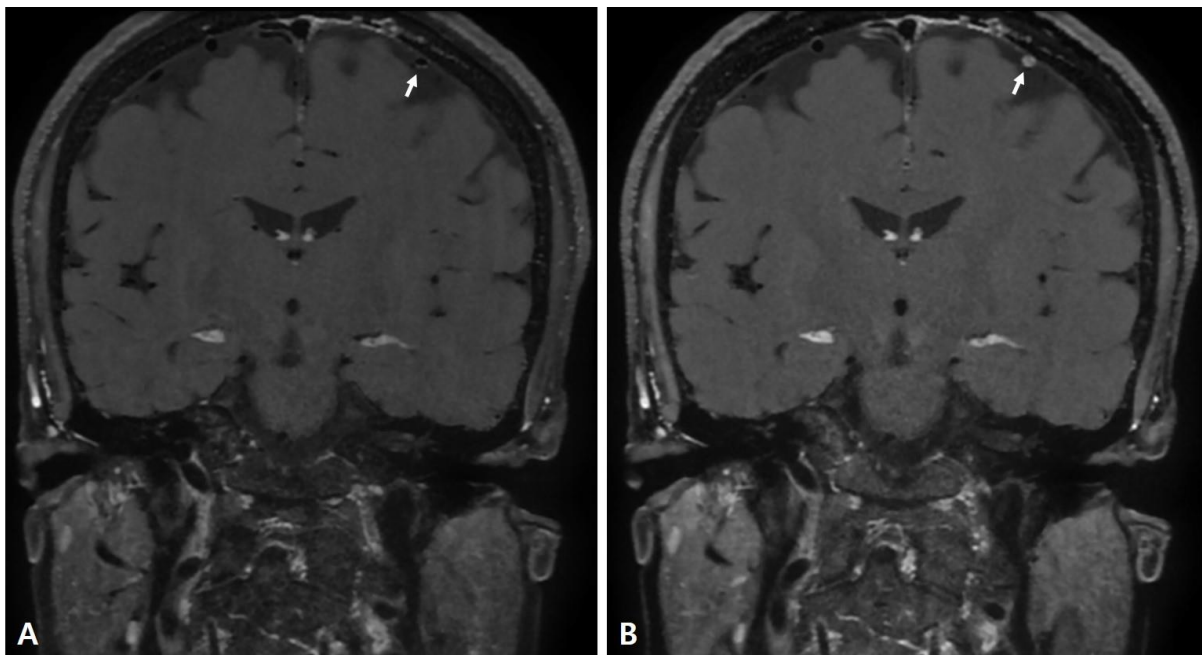

**Supplementary Figure 3.** Coronal images of transverse sinus were obtained from CE 3D-T1-FSE with MSDE (A) and that with DANTE (B). Complete blood suppression in the right transverse sinus is observed on the CE 3D-T1-FSE with MSDE (A, arrow); however, nonsuppression of blood signals in the identical transverse sinus is observed on the CE 3D-T1-FSE with DANTE (B, arrow).

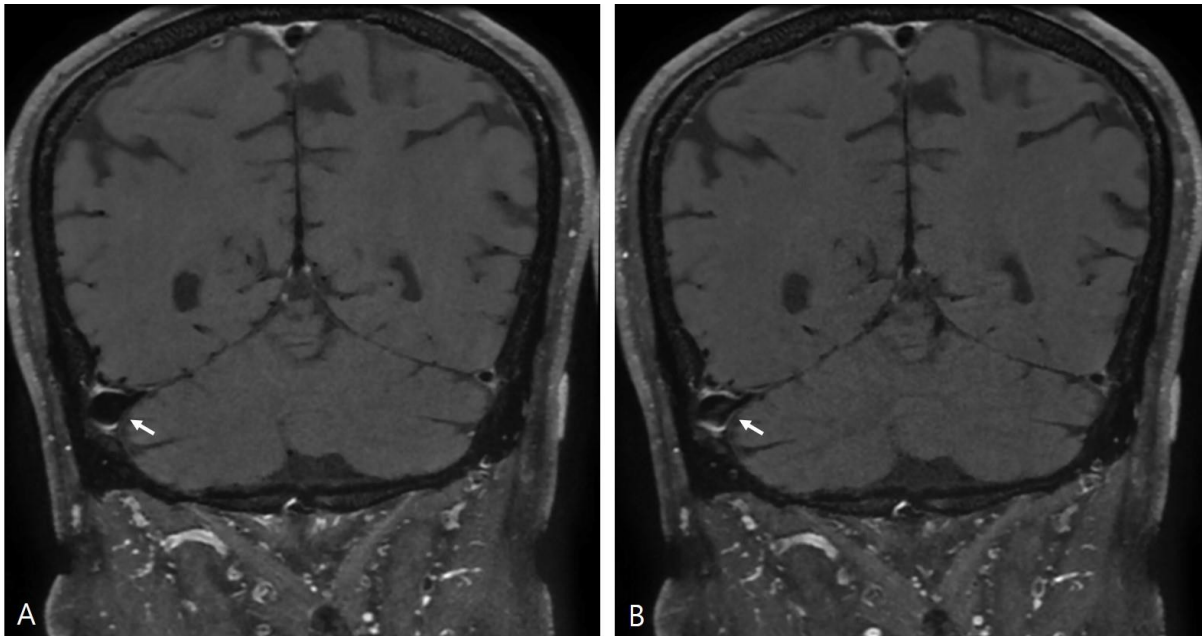

Supplement: 0423.pdf [file 0423.pdf]
